# Supplementary material for: Geographic distribution and prevalence of human echinococcosis at the township level in the Tibet Autonomous Region
Source: Research Square preprint supplement (doi:10.21203/rs.3.rs-915845/v1), 2021-09-20
Supplement: Supplementary file 1 [file 076a3431dd2c94143b1e6386.docx]

**Attachment**

Table 7 The correspondence table between the names of 74 counties involved in this paper and the names of Chinese Pinyin

| Prefecture / Prefecture-level city (municipal level) | | County name  involved in the paper) | | County name of Chinese pinyin |  | Prefecture / Prefecture-level city (municipal level) | County name  involved in the paper) | County name of Chinese pinyin |
| --- | --- | --- | --- | --- | --- | --- | --- | --- |
| Lhasa | Chengguan | | Chengguan | |  |  | Ngamring | Angren |
|  | Lhuunzhub | | Linzhou | |  |  | Xaitongmoin | Xietongmen |
|  | Damxung | | Dangxiong | |  |  | Bainang | Bailang |
|  | Nyeemo | | Nimu | |  |  | Rinbung | Renbu |
|  | Quuxuu | | Qushui | |  |  | Kangmar | Kangma |
|  | Doilungdeeqeen | | Duilong Deqing | |  |  | Dinggyee | Dingjie |
|  | Dagzee | | Dazi | |  |  | Zhongba | Zhongba |
|  | Maizhokunggar | | Mozhu Gongka | |  |  | Yadong(Chomo) | Yadong |
| Changdu | Karuo | | Karuo | |  |  | Gyirong | Jilong |
|  | Jomda | | Jiangda | |  |  | Nyalam | Nielamu |
|  | Konjo | | Gongjue | |  |  | Saga | Saga |
|  | Riwoqee | | Leiwuqi | |  |  | Gamba | Gangba |
|  | Deengqeen | | Dingqing | |  | Naqu | Nagqu | Naqu County |
|  | Chagyab | | Chaya | |  |  | Jiali(Lhari) | Jiali |
|  | Baxoi | | Basu | |  |  | Biru | Biru |
|  | Zogang | | Zuogong | |  |  | Nyainrong | Nierong |
|  | Mangkam | | Mangkang | |  |  | Amdo | Anduo |
|  | Lhorong | | Luolong | |  |  | Xainza | Shenza |
|  | Banbar | | Bianba | |  |  | Sog | Suoxian |
| Shannan | Needong | | Naidong | |  |  | Bangoin | Bange |
|  | Chanang | | Zanang | |  |  | Baqeen | Baqing |
|  | Gonggar | | Gongga | |  |  | Nyima | Nima |
|  | Sangri | | Sangri | |  |  | Shuanghu | Shuanghu |
|  | Qonggyai | | Qiongjie | |  | Ali | Burang | Pulan |
|  | Qusum | | Qusong | |  |  | Zanda | Zhada |
|  | Comai | | Cuomei | |  |  | Gar | Gaer |
|  | Lhozhag | | Luoza b | |  |  | Rutog | Ritu |
|  | Gyaca | | Jiacha | |  |  | Gee'gyai | Geji |
|  | Lhuunzee | | Longzi | |  |  | Geerzee | Gaize |
|  | Cona | | Cuona | |  |  | Coqeen | Cuoqin |
|  | Nagarzee | | Langkazi | |  | Linzhi | Nyingchi | Linzhi County |
| Shigatse | Xigazee | | Sangzhuzi | |  |  | Gongbo'gyamda | Gongbu Jiangda |
|  | Namling | | Nanmulin | |  |  | Mainling | Milin |
|  | Gyangzee | | Jiangzi | |  |  | Metog | Motuo |
|  | Tingri | | Dingri | |  |  | Bomi(Bowo) | Bomi |
|  | Sa'gya | | Sajia | |  |  | Zayuu | Chayu |
|  | Lhazee | | Lazi | |  |  | Nang | Langxian |
